# Supplementary material
Source: Springer Nature journal article supplement (https://www.springermedizin.de/resource/supplementary/12873_2013_193_MOESM3_ESM.pdf/9431598)

**A**

(AORs)

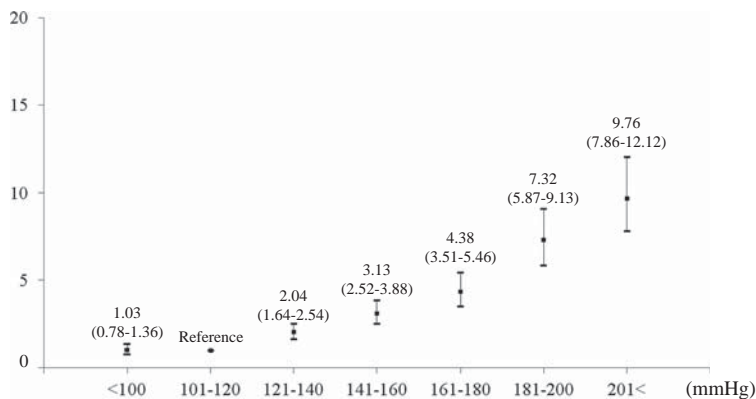**B**

(AORs)

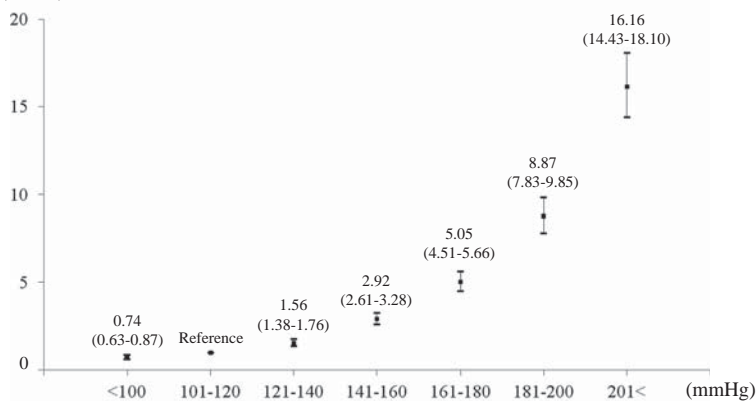**C**

(AORs)

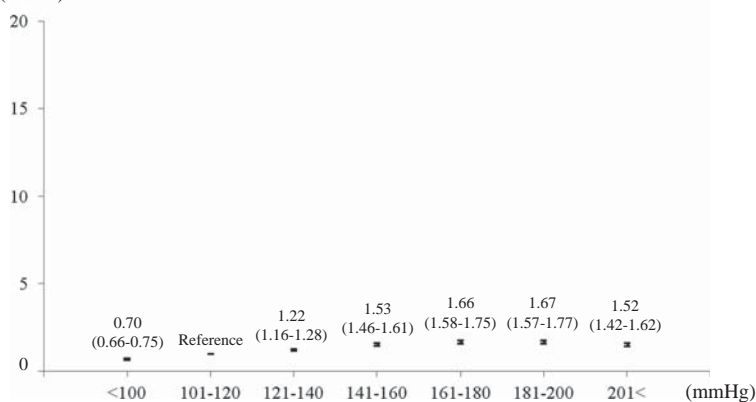

Supplement: MOESM3 [file 9431598]
